# Supplementary material for: Urushiol-functionalized mesoporous silica nanoparticles and their self-assembly into a Janus membrane as a highly efficient hemostatic material
Source: Royal Society of Chemistry journal article supplement (doi:10.1039/c8nr05882b), 2018-01-01
Supplement: c8nr05882b1.pdf [file c8nr05882b1.pdf]

1 Supporting Information

2 **Urushiol-functionalized mesoporous silica**  
3 **nanoparticles and its self-assembly Janus**  
4 **membrane as a highly efficient hemostatic**  
5 **material**

6 *Jiawen Chen<sup>a</sup>, Wei Cheng<sup>a</sup>, Shuning Chen<sup>a</sup>, Wenqin Xu<sup>a</sup>, Jinhua Lin<sup>a</sup>,*

7 *Haiqing Liu<sup>\*,a,b</sup>, Qinhui Chen<sup>\*,a,b</sup>*

8 <sup>a</sup> *College of Chemistry and Materials Science, Fujian Normal University, Fuzhou*

9 *350007, People's Republic of China*

10 <sup>b</sup> *Fujian Provincial Key Laboratory of Polymer Materials, Fujian Normal University,*

11 *Fuzhou 350007, People's Republic of China*

12 \* Corresponding Authors. E-mails: [haiqingliu@fjnu.edu.cn](mailto:haiqingliu@fjnu.edu.cn) (H. Q. Liu),

13 [chenqh@fjnu.edu.cn](mailto:chenqh@fjnu.edu.cn) (Q. H. Chen)

14 **List of the contents of the material supplied as Supporting Information:**

15 **Table S1.** The EDS dates of MSN, MSN-MPS and MSN@U

16 **Figure S1.** TGA-DTG curves of MSN and MSN@U.

17

18 The EDS dates of MSN, MSN-MPS and MSN@U particles were shown in Table  
19 S1. There was no carbon element in MSN particles. When MSN was modified by  
20 MPS, carbon element could be detected. When the surface of MSN-MPS particles  
21 was further modified by urushiol, the relative content of carbon element increased  
22 because urushiol is a natural organic polymer with long alkyl side chains (C<sub>15-17</sub>)  
23 including 0-3 double bonds in different location. It indicated that urushiol has been  
24 grafted onto the surface of MSN particles.

25 **Table S1.** The EDS dates of MSN, MSN-MPS and MSN@U partilces

| Sample  | WT (%) |       |       | AT (%) |       |       |
|---------|--------|-------|-------|--------|-------|-------|
|         | Si     | O     | C     | Si     | O     | C     |
| MSN     | 48.72  | 51.28 | /     | 35.11  | 64.89 | /     |
| MSN-MPS | 36.26  | 51.55 | 12.19 | 23.35  | 58.29 | 18.35 |
| MSN@U   | 36.19  | 38.99 | 24.82 | 22.25  | 42.08 | 35.67 |

26 The conjugated value of urushiol on MSN was measured by TGA-DTG. Figure  
27 S1 showed the thermograms of MSN and MSN@U. 3.76% of weight loss of MSN  
28 was water molecule. The thermogravimetric curve of MSN@U was divided into two

29 stages that were the evaporation of water molecule and the degradation of organic  
 30 matter. Owing to the urushiol conjugated on the surface of MSN, the fastest  
 31 evaporation temperature of water rose from 40°C to 51°C and the content of  
 32 adsorptive water decreased obviously. The fast decomposition temperature of  
 33 MSN@U was 336°C corresponding with the degradation of urushiol. The weight loss  
 34 was about 15.02%. It could be deduced that the urushiol conjugated on the surface of  
 35 MSN was about 15.02%. This certified the formation of MSN@U again.

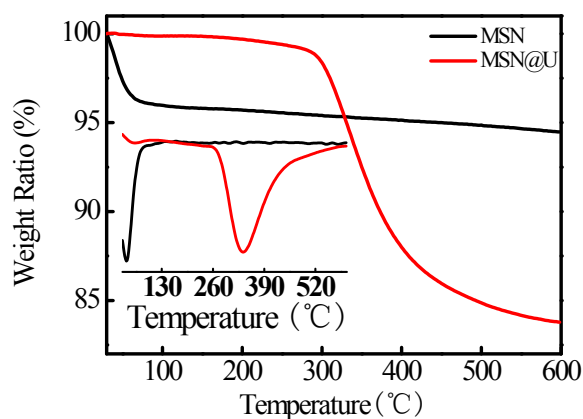

36  
 37 **Figure S1.** TGA-DTG curves of MSN and MSN@U.
